# Supplementary material for: Comparative Analysis of the Diversity of the Microbial Communities between Non-Fertilized and Fertilized Eggs of Brown Planthopper, Nilaparvata lugens Stål
Source: MDPI journal article supplement (doi:10.3390/insects11010049), 2020-01-10
Supplement: s1 [file s1]

# Comparative analysis of the diversity of the microbial communities between non-fertilized and fertilized eggs of brown planthopper, *Nilaparvata lugens* Stål

Xuping Shentu<sup>1</sup>, Yin Xiao<sup>1</sup>, Yang Song, Zhenyan Cao, Jingxuan Fan and Xiaoping Yu\*

Zhejiang Provincial Key Laboratory of Biometrology and Inspection & Quarantine, College of Life Science, China Jiliang University, Hangzhou 310018, China

<sup>1</sup> Contributed equally to this article

\* Correspondence: yxp@cjl.u.edu.cn; Tel.: +86-571-86836006; Fax: +86-571-86836006

**Figure S1** Rarefaction curve analysis of fertilized eggs and non-fertilized eggs of Good's coverage. The non-fertilized eggs included UF1, UF2 and UF3. The fertilized eggs included F1, F2 and F3.

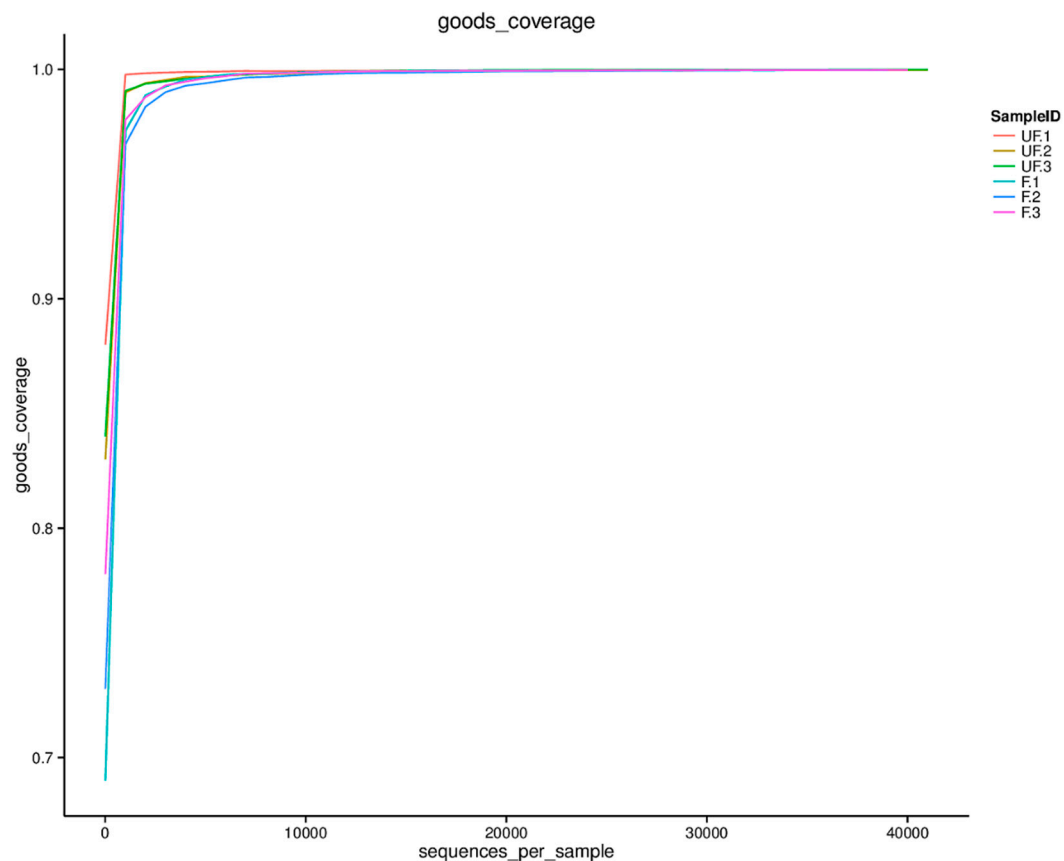

**Table S1** The Anosim analysis by calculating the distance of Binary Curtis

| Method | R statistic | <i>p</i> -value | Number of permutations |
|--------|-------------|-----------------|------------------------|
| Anosim | 1.0000      | 0.097           | 999                    |

R: the difference between groups. The R near 1 indicated the difference between groups was more obvious than the difference in groups.
